# Supplementary material
Source: PubMed Central journal article supplement (PMC4889220)
Supplement: NIHMS786345-supplement-01.pdf [file NIHMS786345-supplement-01.pdf]

# Figure S1

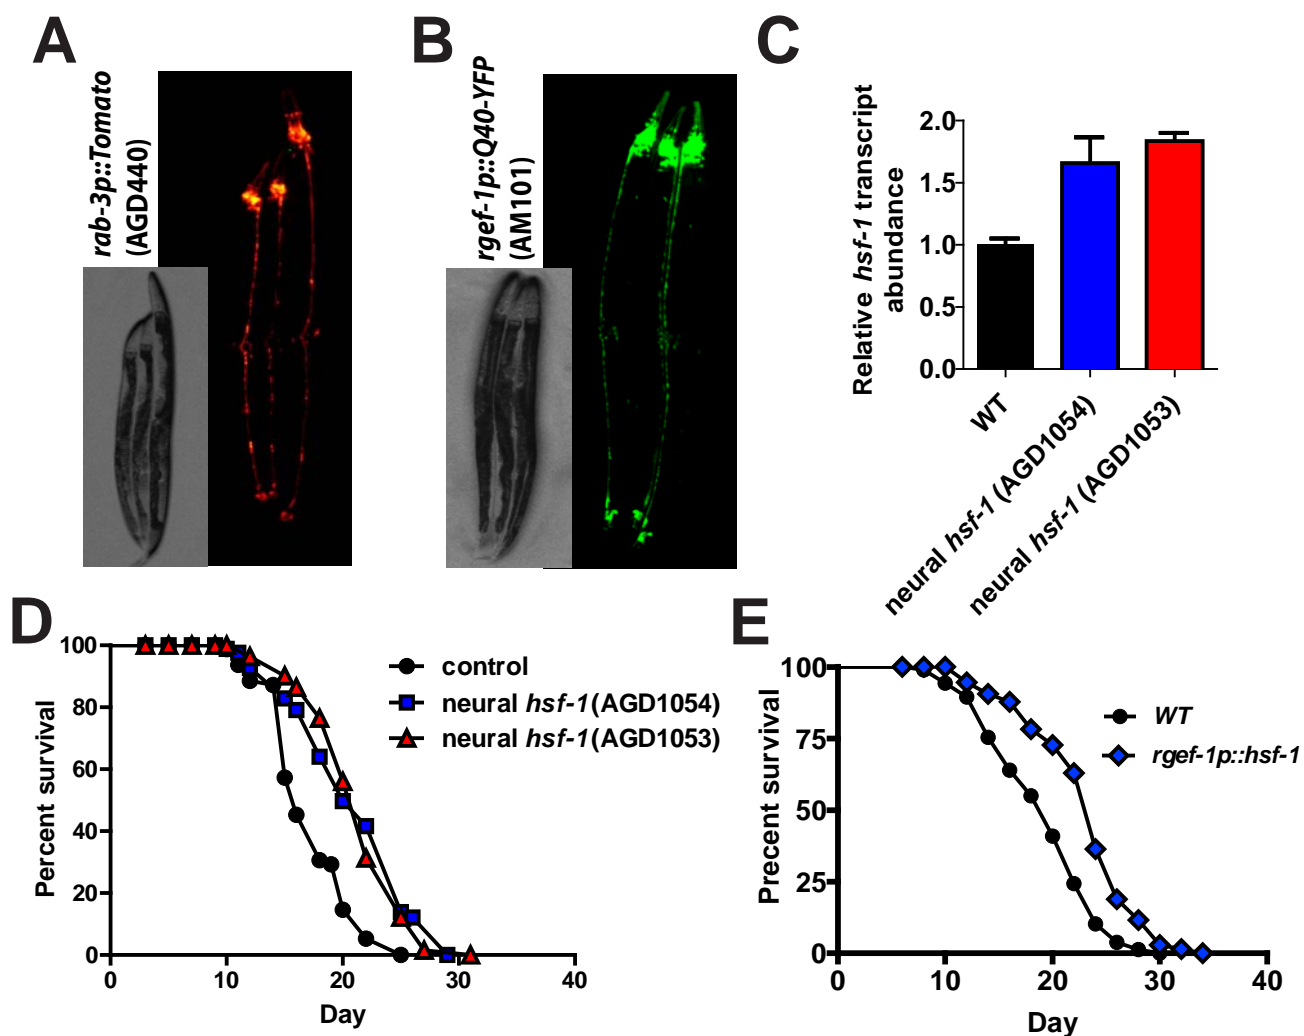

**Figure S1. Ectopic overexpression of *hsf-1* in the nervous system extends lifespan of *C. elegans*, Related to Figure 1. (A-B)** Characterization of neural specific promoters in which worms express transgenic copies of the fluorescent proteins, Tomato or Q40-YFP, under control of the *rab-3* (AGD440) and *gref-1* (AM101) promoter elements, respectively. L4 and day 1 adult animals were cultured at 20°C. **(C)** Quantitative RT-PCR of *hsf-1* mRNA from wild type (N2) and *rab-3p::hsf-1* transgenic worms (AGD1053 and AGD1054). **(D)** Lifespan survival curves of animals used in (C) were performed at 20°C. **(E)** Lifespan survival curves of wild type and *rgef-1p::hsf-1* (AGD1441). Lifespan statistics are found in Table 1.

# Figure S2

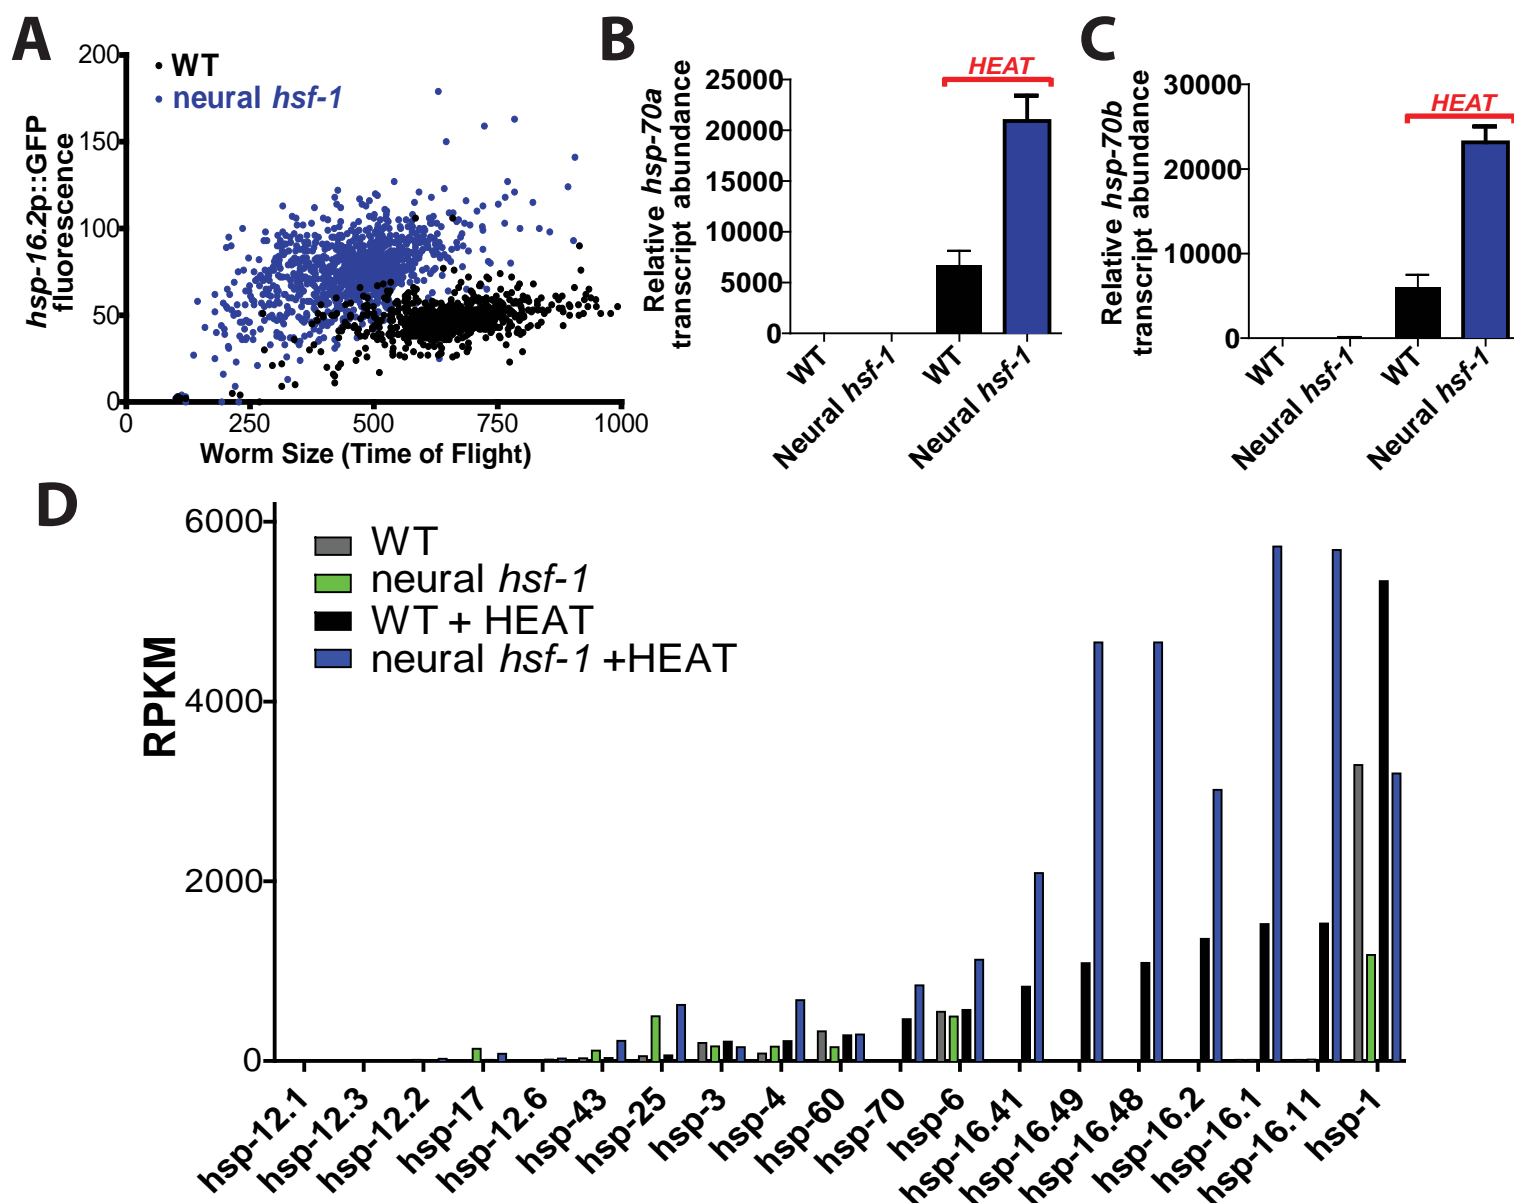

**Figure S2. Neural overexpression of *hsf-1* increases the induction of the heat shock network, Related to Figure 2.** (A) Flow cytometry shows the distribution of heat inducible GFP fluorescence from the *hsp-16.2p::GFP* reporter in a worm population of wild type (CL2070) and *rab-3p::hsf-1* transgenic worms (AGD1448). (B-C) Quantitative RT-PCR of *hsp-70a*(C12C8.1) and *hsp-70b*(F44E5.4) mRNAs in wild type (N2) and *rab-3p::hsf-1* transgenic worms (AGD1289). (D) Quantification of all annotated heat shock transcripts (*hsp*) under heat stress (34°C) and at permissive temperatures (20°C) in wild type (N2) and neural *hsf-1* overexpressing worms (AGD1289). Transcript abundance was normalized by read per kilobase of transcript per million sequencing reads (RPKM) for each condition or genotype.

# Figure S3

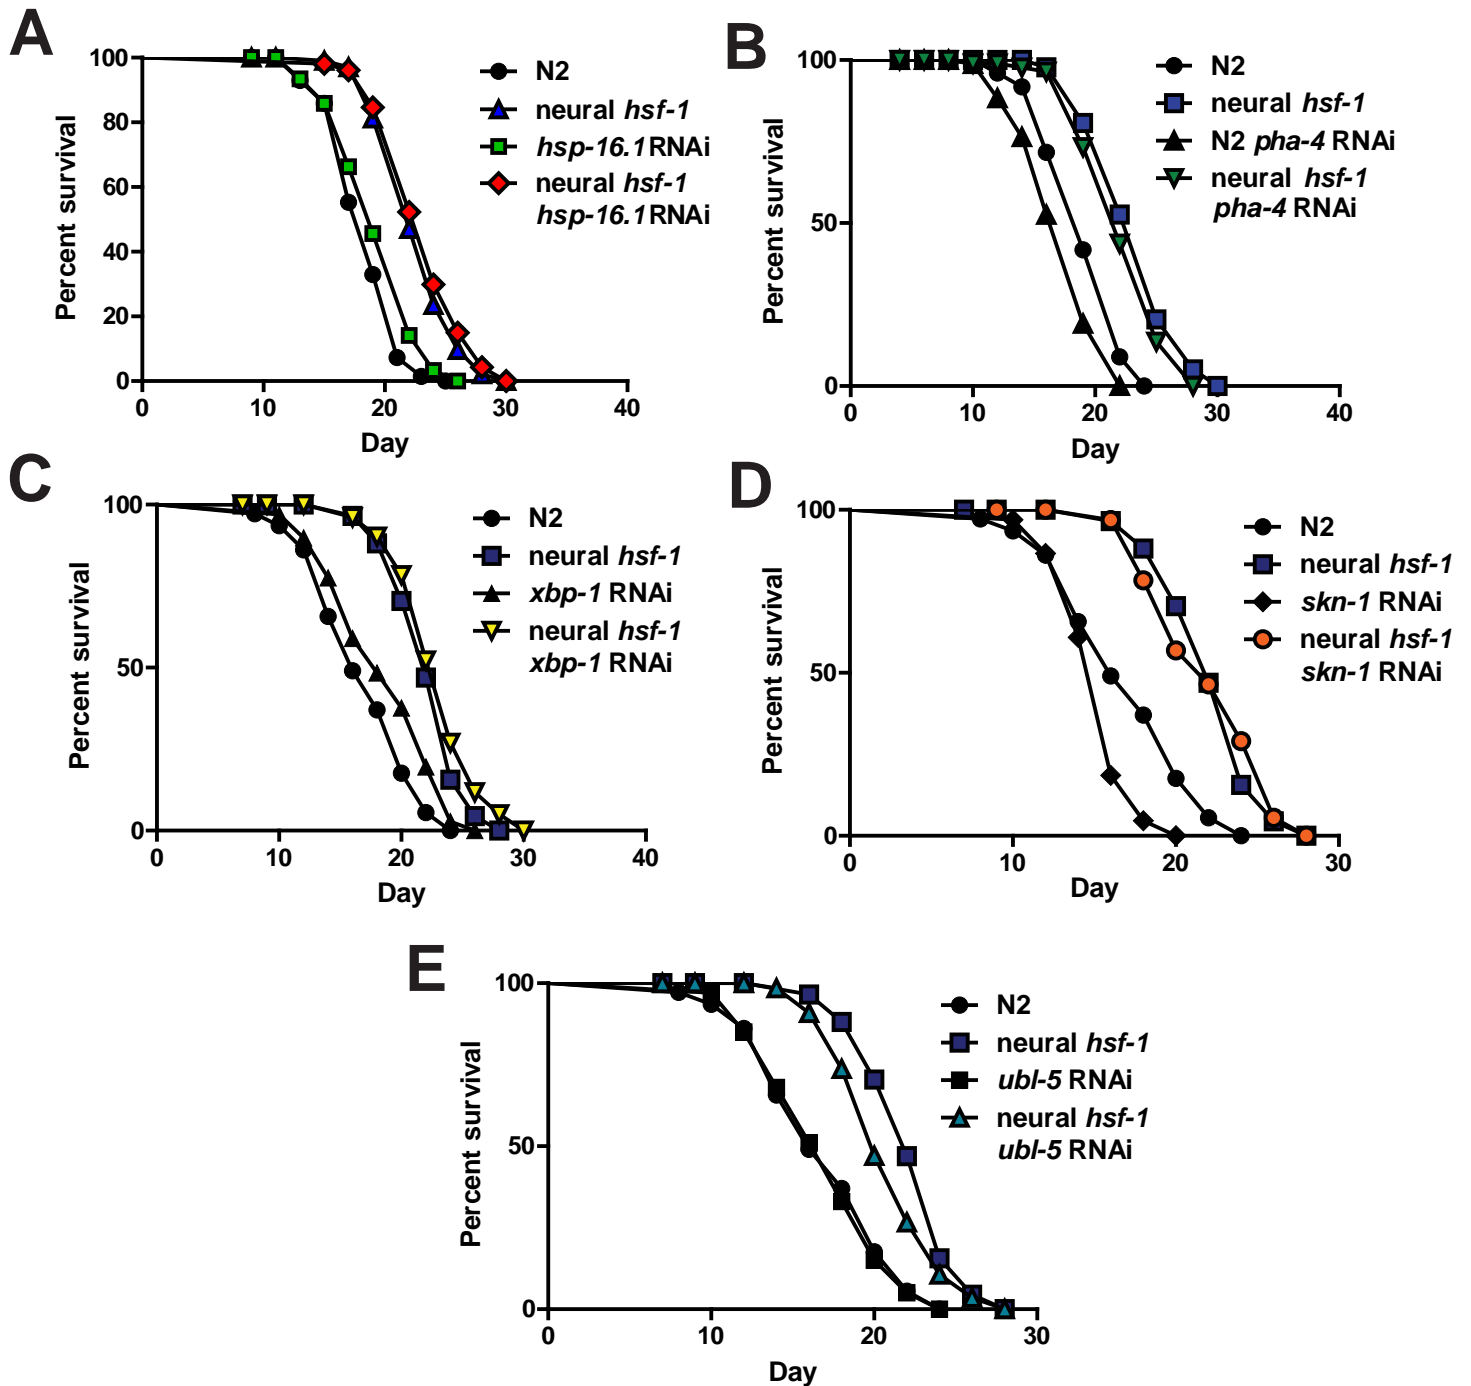

**Figure S3. Lifespan extension by neural *hsf-1* overexpression is not dependent on *hsp-16* or several regulatory transcription factors, Related to Figure 3. (A-E) Lifespan survival curves of wild type (N2) and *rab-3p::hsf-1* transgenic worms (AGD1289) cultured at 20°C on HT115 *E. coli* harboring interfering RNAs for (A) *hsp-16*, (B) *pha-4*, (C) *xbp-1*, (D) *skn-1* and (E) *ubl-5*. Lifespan statistics are found in Table 1.**

# Figure S4

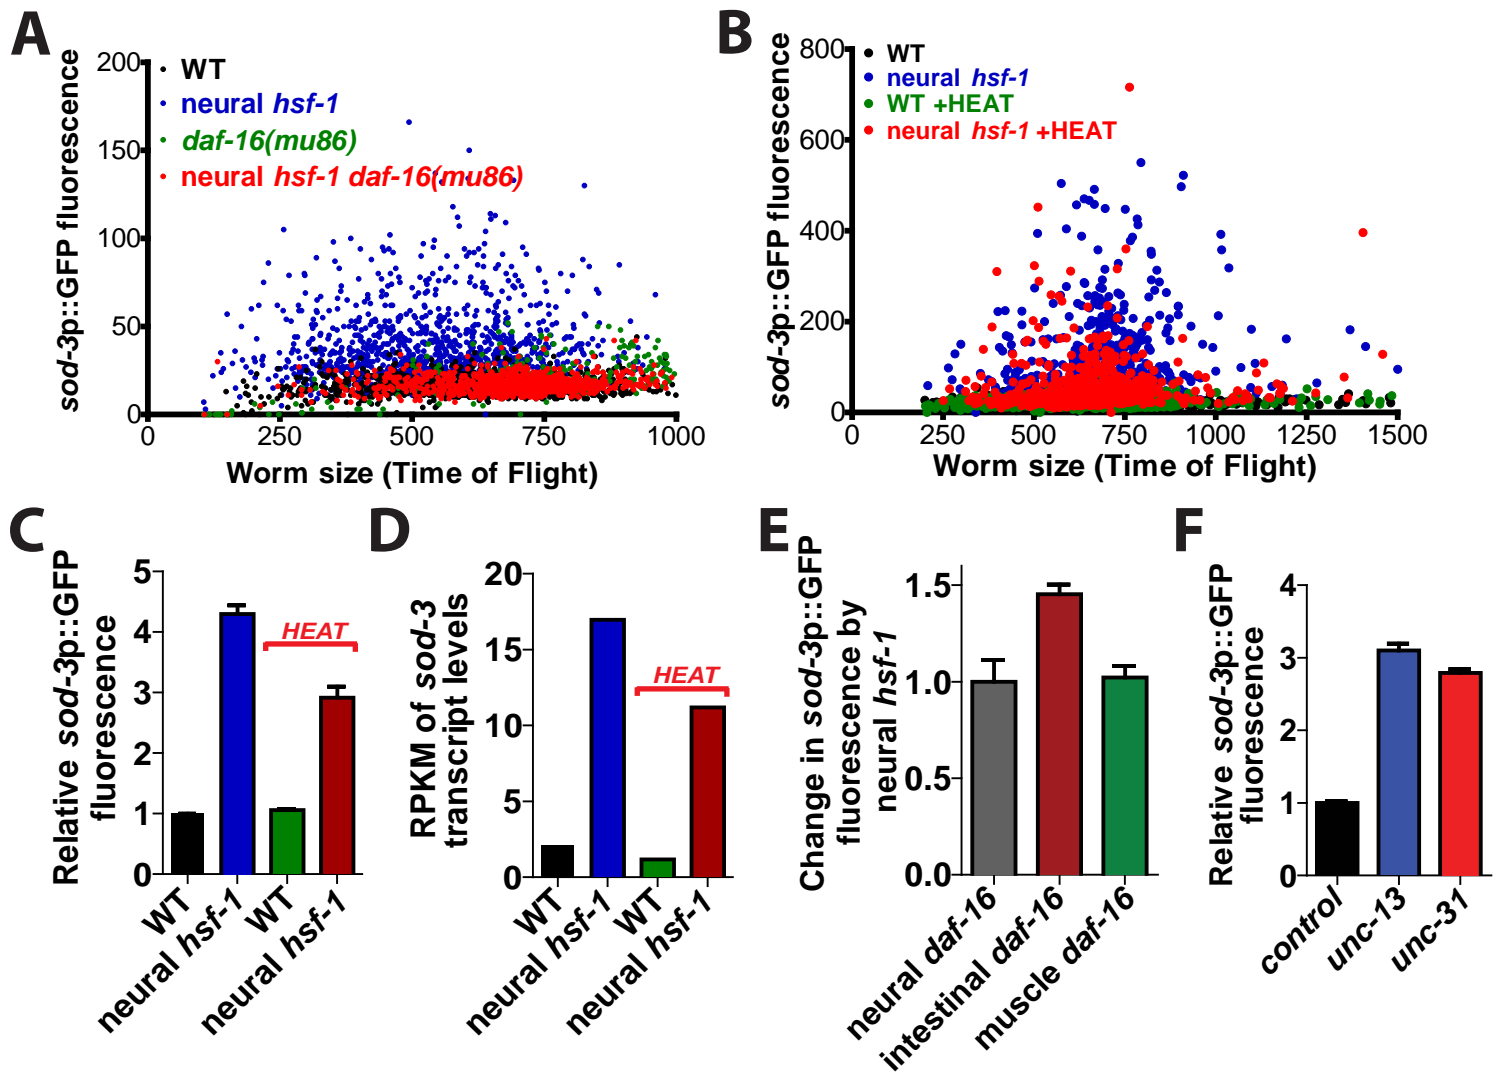

**Figure S4. Dynamics for the activation of the DAF-16 transcriptional target, *sod-3*, Related to Figure 4. (A)** DAF-16 dependent induction of *sod-3* by neural *hsf-1* overexpression. Flow cytometry shows the distribution of GFP fluorescence in individual *sod-3p::GFP* reporting animals (CF1553). The *daf-16(mu86)* allele was used to assess dependence of the *daf-16* on neural *hsf-1* induced *sod-3* expression in day 1 adult nematodes. Fluorescent expression of the *sod-3* reporter in the presence of *rab-3p::hsf-1* (AGD1198) was compared to the same worms in the *daf-16(mu86)* null background (AGD1457). **(B-D)** Influence of heat shock (34°C) on *sod-3* activation. **(B)** Flow cytometry shows the distribution of GFP fluorescence in individual *sod-3p::GFP* reporting animals with (AGD1189) and without (CF1553) *rab-3p::hsf-1* under heat stress (34°C) and at permissive temperatures (20°C). **(C)** Quantification of GFP fluorescence from flow cytometry in (B). **(D)** Through RNA-sequencing analysis, transcript abundance of *sod-3* was normalized by reads per kilobase of transcript per million sequencing reads (RPKM) in wild type and *rab-3p::hsf-1* transgenic worms (AGD1289). **(E)** Neural *hsf-1* overexpression requires *daf-16* in the intestine to activate *sod-3*. Flow cytometry was used to quantify the distribution of GFP fluorescence in individual *sod-3p::GFP* reporting worms. Cultured at 20°C on OP50 *E. coli*, all worms were in a *daf-16(mu86)* null background and extopic expression of *daf-16* was rescued in individual tissues including the nervous system (AGD1313), intestine (AGD1315) and body-wall muscle (AGD1316). Shown is a normalized ratio of quantified GFP fluorescence (GFP signal from neural *hsf-1* overexpression/GFP signal from the respective control strain). **(F)** Abolishing dense-core vesicle and small-clear vesicle release from neurons induces expression of *sod-3*. Flow cytometry was used to quantify the distribution of GFP fluorescence in individual *sod-3p::GFP* reporting animals in *unc-13* (AGD1475) and *unc-31* (AGD1576) mutant backgrounds. Show in the quantification of GFP fluorescence.

# Table S1

| Element | Sequence | Times Present | e-value  |
|---------|----------|---------------|----------|
| DAE     | CTTATCA  | 60            | 1.20E-03 |
| HSE     | TTCTAGAA | 25            | N.D.     |

| seq          | CTTATCA | TTCTAGAA |
|--------------|---------|----------|
| B0336.2.1    | 2       | 0        |
| C04F12.1     | 1       | 0        |
| C04F6.1.3    | 1       | 0        |
| NP_495640.1  | 1       | 0        |
| C06G8.1      | 2       | 0        |
| C27H6.4b     | 0       | 0        |
| C31B8.4      | 0       | 0        |
| C32F10.8b.1  | 0       | 1        |
| C34F11.3b    | 0       | 1        |
| ADF1_CAEEL   | 0       | 1        |
| C49G7.5      | 0       | 0        |
| EEED8.4      | 0       | 0        |
| F01F1.6.1    | 0       | 1        |
| F08H9.4      | 0       | 1        |
| F09E5.8      | 0       | 0        |
| F11A6.1b     | 0       | 3        |
| F11D11.3     | 1       | 0        |
| F11G11.2     | 1       | 0        |
| F15B9.1      | 1       | 0        |
| F19B6.2b     | 0       | 0        |
| F22A3.6a     | 1       | 1        |
| F22B7.9      | 0       | 0        |
| F28D1.5      | 1       | 0        |
| NP_491282.1  | 0       | 0        |
| F35C11.3     | 0       | 1        |
| F35C8.6      | 0       | 1        |
| NP_505928.1  | 1       | 0        |
| F41C3.5.1    | 1       | 0        |
| F45E1.4      | 1       | 1        |
| F45F2.12     | 0       | 0        |
| F46E10.10c.2 | 1       | 0        |
| F47H4.2      | 1       | 0        |
| F52E1.7a     | 1       | 0        |
| F54C1.7.4    | 0       | 0        |
| F55H2.2.1    | 0       | 0        |
| F56B6.4c     | 1       | 0        |
| F57B10.3b.2  | 0       | 0        |
| F57F4.3      | 0       | 0        |
| F58B3.1      | 0       | 0        |

|              |    |    |
|--------------|----|----|
| H15N14.1f    | 0  | 0  |
| ASP3_CAEEL   | 0  | 1  |
| H23L24.5     | 0  | 0  |
| K07E3.4b     | 1  | 0  |
| K08E3.5a.1   | 2  | 1  |
| K08F4.9      | 0  | 2  |
| K10G4.3      | 0  | 0  |
| K12C11.1.1   | 1  | 0  |
| K12C11.4     | 0  | 1  |
| M03F4.7b     | 1  | 0  |
| M05D6.4      | 1  | 0  |
| R05F9.10     | 1  | 0  |
| R05F9.6      | 3  | 0  |
| R05H10.5     | 0  | 0  |
| R07E3.3      | 0  | 0  |
| R107.7.2     | 0  | 1  |
| R11H6.1.2    | 0  | 0  |
| R12E2.11     | 0  | 0  |
| T04H1.9      | 0  | 0  |
| T05H4.6.3    | 0  | 0  |
| T07C4.9b.2   | 1  | 0  |
| T12A2.2.2    | 0  | 0  |
| T14F9.1.2    | 0  | 1  |
| T14G11.3     | 0  | 0  |
| T19D12.4b    | 2  | 1  |
| T20G5.1      | 1  | 0  |
| T21B4.9      | 3  | 1  |
| T25C8.2.1    | 4  | 1  |
| W01F3.2      | 2  | 1  |
| W03D2.6      | 2  | 0  |
| W03G1.7b     | 2  | 0  |
| Y105C5B.15   | 1  | 0  |
| Y105E8B.1e.2 | 0  | 1  |
| Y113G7B.2    | 0  | 0  |
| Y47G7B.2     | 0  | 0  |
| Y49A3A.2.2   | 1  | 0  |
| Y50D7A.7.1   | 3  | 0  |
| Y54E2A.11b.2 | 0  | 0  |
| Y55B1AR.1.1  | 4  | 0  |
| Y69H2.3d.2   | 0  | 0  |
| Y87G2A.5     | 0  | 0  |
| ZK1037.5     | 3  | 1  |
| ZK666.6      | 2  | 0  |
| total        | 60 | 25 |

**Table S1.** The *daf-16* associated element (DAE) was detected de novo as an overrepresented sequence on promoters of genes that are upregulated by *hsf-1* overexpression and correlate with heat protection, Related to Figure 3. The canonical *C. elegans* heat shock element (HSE) was not detected (N.D.) as an overrepresented sequence on promoters of genes upregulated by elevated *hsf-1*. The CTTATCA and TTCTAGAA nucleotide sequences correspond to the DAE and HSE respectively.
